# Supplementary material
Source: bioRxiv or medRxiv preprint supplement (https://www.biorxiv.org/highwire/filestream/73579/field_highwire_adjunct_files/1/240572-2.pdf)
Supplement: Supplementary file [file 240572-2.pdf]

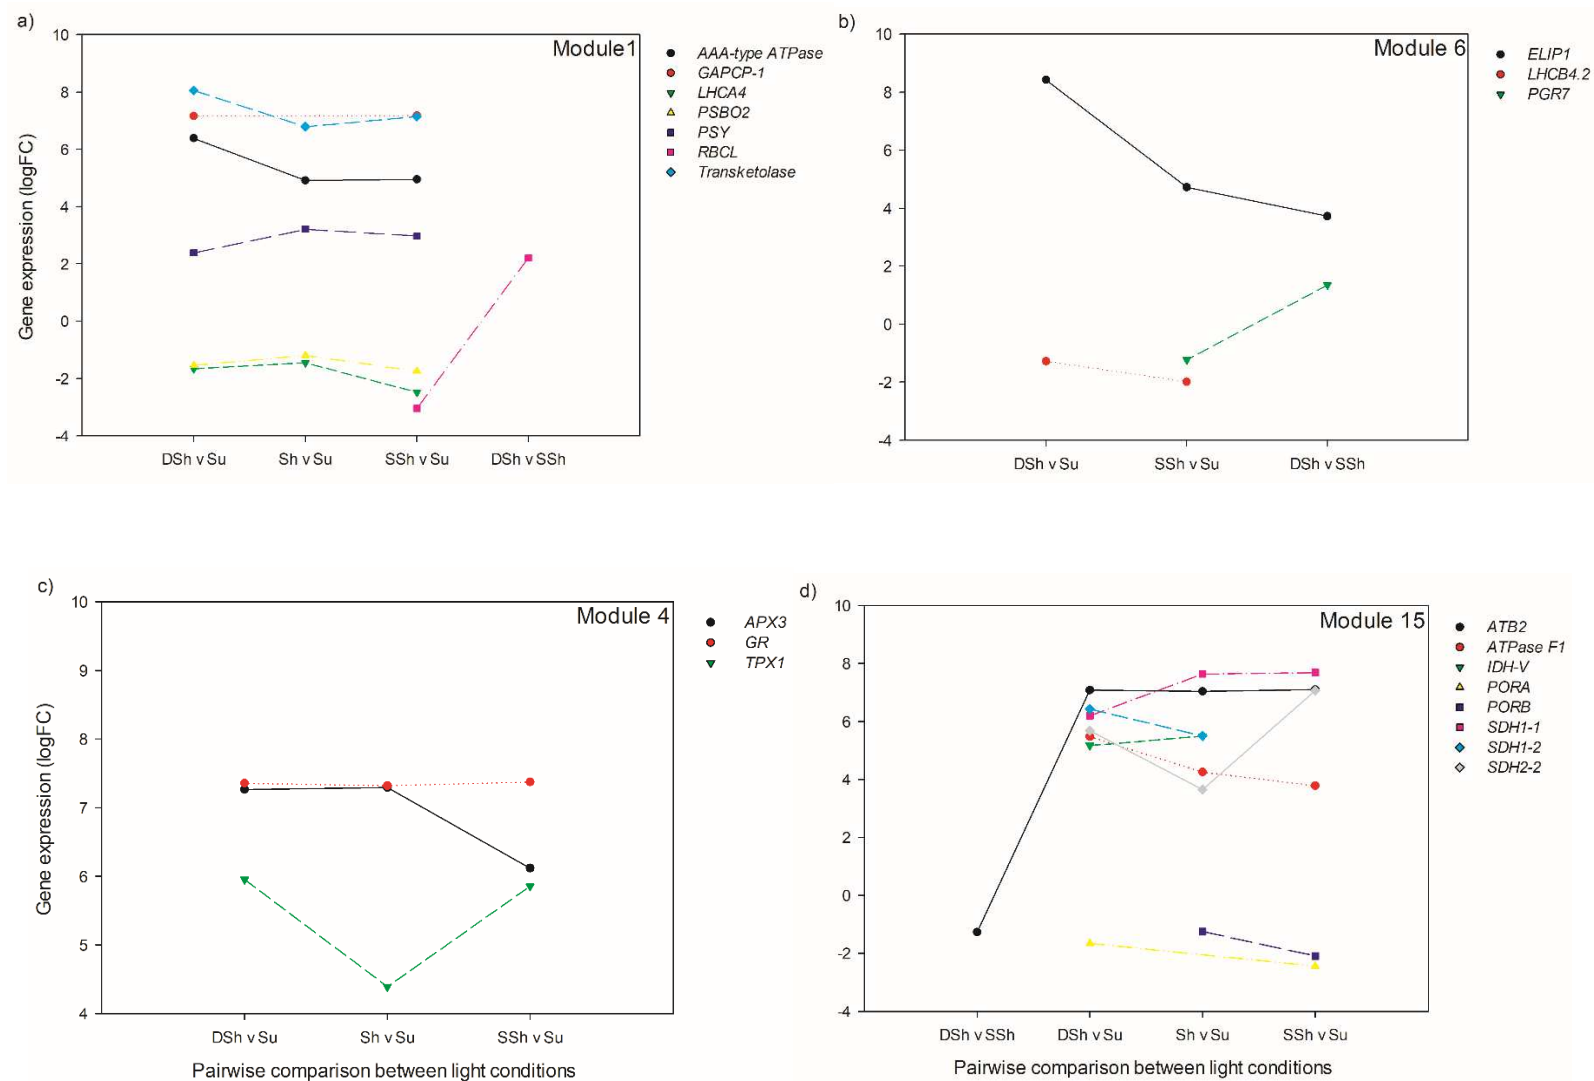

**Supplemental Fig.S2.** Representative genes in modules 1, 6, 4, and 15 of the co-expression network. Each plot shows the values of fold change (logFC) of genes for each pairwise comparison between light conditions within a given module. See Results section for details of their function in photosynthesis and light related processes. (Details of pairwise comparison between light conditions: DSh v SSh = Deep Shade v Semi Shade; DSh v Su = Deep Shade v Sun; Sh v Su = Shade v Sun; SSh v Su = Semi Shade v Sun. Details of gene abbreviations: *GAPCP-1*, glyceraldehyde-3-phosphate dehydrogenase of plastid 1; *LHCA4*, light-harvesting chlorophyll-protein complex I subunit A4; *PSBO2*, photosystem II subunit O-2; *PSY*, phytoene synthase; *RBCL*, ribulose-biphosphate carboxylase; *ELIP1*, early light-induced protein 1; *LHCB4.2*, light harvesting complex photosystem II; *PGR7*, proton gradient regulation 7; *APX3*, ascorbate peroxidase 3; *GR*, glutathione reductase; *TPX1*, thioredoxin-dependent peroxidase 1; *ATB2*, NAD(P)-linked oxidoreductase superfamily protein; *IDH-V*, isocitrate dehydrogenase V; *PORA*,

protochlorophyllide oxidoreductase A; *PORB*, protochlorophyllide oxidoreductase B; *SDHI-1*, succinate dehydrogenase 1-1; *SDHI-2*, succinate dehydrogenase 1-2; *SDHI-1*, succinate dehydrogenase 2-2.)
